# Supplementary material for: Heptazine-based porous graphitic carbon nitride: a visible-light driven photocatalyst for water splitting
Source: Royal Society of Chemistry journal article supplement (doi:10.1039/c9ta03646f), 2019-01-01
Supplement: c9ta03646f1.pdf [file c9ta03646f1.pdf]

# Heptazine-based porous graphitic carbon nitride: a visible-light driven photocatalyst for water splitting

Bin Liu<sup>a</sup>, Bo Xu<sup>a, b, \*</sup>, Shenchang Li<sup>a</sup>, Jinli Du<sup>a</sup>, Jiang Yin<sup>b, c</sup>, Zhiguo Liu<sup>c</sup>,  
Wenying Zhong<sup>a, \*</sup>

<sup>a</sup> School of Science and Key Laboratory of Biomedical Functional Materials, China Pharmaceutical University, Nanjing 211198, China. Emails: [xubo@cpu.edu.cn](mailto:xubo@cpu.edu.cn) and [wyzhong@cpu.edu.cn](mailto:wyzhong@cpu.edu.cn).

<sup>b</sup> National Laboratory of Solid State Microstructures and Department of Materials Science and Engineering, College of Engineering and Applied Sciences, Nanjing University, Nanjing 210093, China.

<sup>c</sup> Collaborative Innovation Center of Advanced Microstructures, Nanjing University, Nanjing, 210093, China.

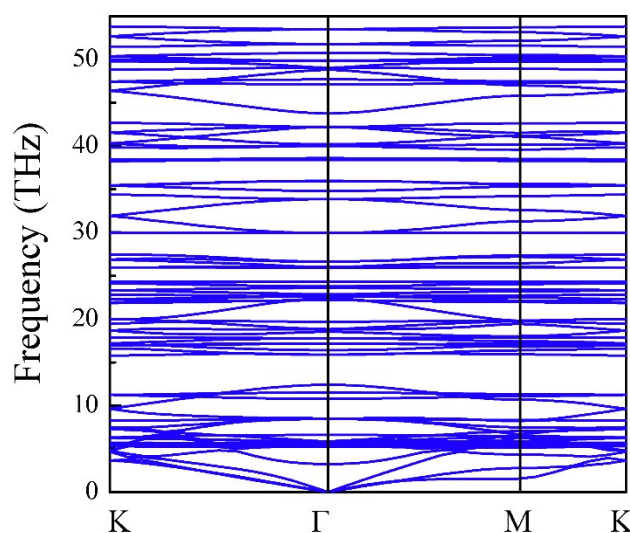

**Fig. S1** The full of phonon dispersion of C<sub>6</sub>N<sub>7</sub> monolayer.

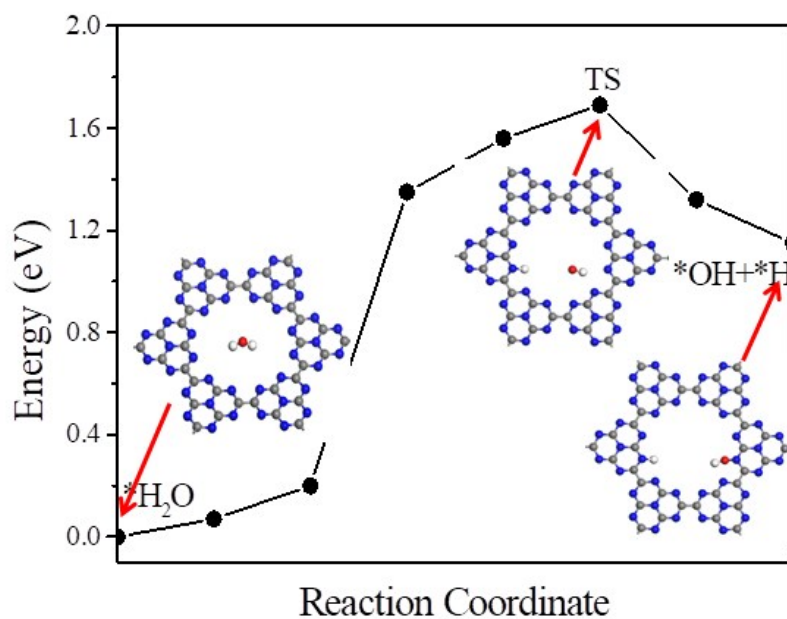

**Fig. S2** Minimum energy path for the dissociation of a water molecule on the surface of  $C_6N_7$  monolayer with the optimized geometries of the  $*H_2O$ , transition state (TS), and  $*OH + *H$ .

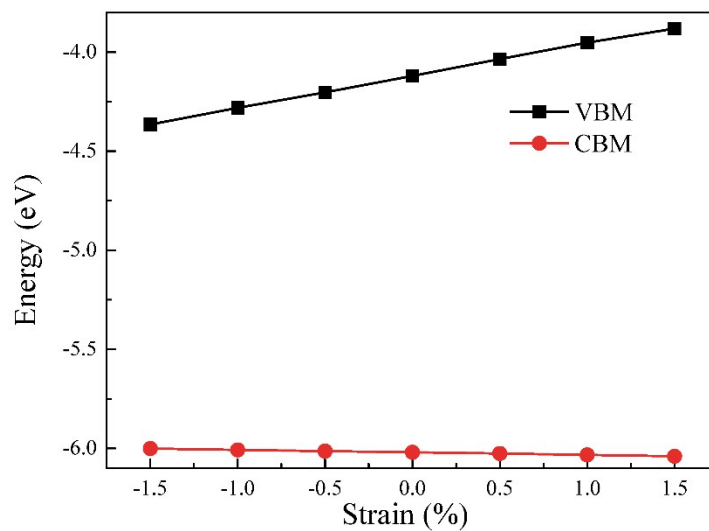

**Fig. S3** The shift of VBM and CBM for  $C_6N_7$  monolayer with respect to the vacuum energy, as a function of the applied strain. The linear fit of the data yields the deformation potential constant.
